# Supplementary material
Source: publisher figshare collection journal article supplement (https://karger.figshare.com/articles/dataset/_/3996102)
Supplement: Supplementary file 1 [file 1]

**Appendix D.** Correlation matrix between hypermethylation status of genes that predict biochemical recurrence after radical prostatectomy

| <b>Pearson Correlation Coefficients (n=58)</b> |             |               |              |            |              |             |
|------------------------------------------------|-------------|---------------|--------------|------------|--------------|-------------|
|                                                | <b>MT1A</b> | <b>ALOX12</b> | <b>GSTM2</b> | <b>APC</b> | <b>MYCL2</b> | <b>RARB</b> |
| <b>MT1A</b>                                    | 1           | 0.66          | 0.66         | 0.48       | 0.70         | 0.78        |
| <b>ALOX12</b>                                  | 0.66        | 1             | 0.70         | 0.58       | 0.59         | 0.77        |
| <b>GSTM2</b>                                   | 0.66        | 0.70          | 1            | 0.69       | 0.66         | 0.85        |
| <b>APC</b>                                     | 0.48        | 0.58          | 0.69         | 1          | 0.48         | 0.66        |
| <b>MYCL2</b>                                   | 0.70        | 0.59          | 0.66         | 0.48       | 1            | 0.71        |
| <b>RARB</b>                                    | 0.78        | 0.77          | 0.85         | 0.66       | 0.71         | 1           |
