# Supplementary material
Source: publisher figshare collection journal article supplement (https://karger.figshare.com/articles/dataset/_/3996102)
Supplement: Supplementary file 2 [file 1]

**Appendix B.** Differences among clusters in the frequency (%) of hypermethylation for each individual gene identified. The table shows the values for 28 genes that are differentially methylated ( $p < 0.05$ ).

| Gene           | Cluster |      |          |      |          |        |          |        | P-Value                  |                    |
|----------------|---------|------|----------|------|----------|--------|----------|--------|--------------------------|--------------------|
|                | 1 (N=9) |      | 2 (N=21) |      | 3 (N=15) |        | 4 (N=13) |        |                          |                    |
|                | N       | %    | N        | %    | N        | %      | N        | %      | Fisher test<br>raw value | Holm<br>correction |
| <i>ALOX12</i>  | 1       | 11.1 | 4        | 19   | 5        | 33.3   | 13       | 100    | <.0001                   | <.0001             |
| <i>APC</i>     | 0       | 0    | 2        | 9.5  | 3        | 20     | 12       | 92.3   | <.0001                   | <.0001             |
| <i>CCNA1</i>   | 0       | 0    | 0        | 0    | 10       | 66.7   | 12       | 92.3   | <.0001                   | <.0001             |
| <i>CFTR</i>    | 0       | 0    | 0        | 0    | 8        | 53.3   | 13       | 100    | <.0001                   | <.0001             |
| <i>COL18A1</i> | 0       | 0    | 1        | 4.8  | 13       | 86.7   | 12       | 92.3   | <.0001                   | <.0001             |
| <i>ERG</i>     | 0       | 0    | 0        | 0    | 11       | 73.3   | 11       | 84.6   | <.0001                   | <.0001             |
| <i>EYA4</i>    | 0       | 0    | 0        | 0    | 10       | 66.7   | 10       | 76.9   | <.0001                   | <.0001             |
| <i>GADD45A</i> | 0       | 0    | 0        | 0    | 11       | 73.3   | 10       | 76.9   | <.0001                   | <.0001             |
| <i>GF11</i>    | 0       | 0    | 0        | 0    | 12       | 80     | 11       | 84.6   | <.0001                   | <.0001             |
| <i>GSTM2</i>   | 1       | 11.1 | 18       | 85.7 | 1        | 6.7    | 13       | 100    | <.0001                   | <.0001             |
| <i>GSTP1</i>   | 0       | 0    | 7        | 33.3 | 2        | 13.3   | 13       | 100    | <.0001                   | <.0001             |
| <i>KLK10</i>   | 0       | 0    | 1        | 4.8  | 11       | 73.3   | 11       | 84.6   | <.0001                   | <.0001             |
| <i>MET</i>     | 0       | 0    | 0        | 0    | 12       | 80     | 13       | 100    | <.0001                   | <.0001             |
| <i>MFAP4</i>   | 0       | 0    | 1        | 4.8  | 11       | 73.3   | 11       | 84.6   | <.0001                   | <.0001             |
| <i>MMP14</i>   | 0       | 0    | 0        | 0    | 12       | 80     | 12       | 92.3   | <.0001                   | <.0001             |
| <i>MT1A</i>    | 0       | 0    | 0        | 0    | 7        | 46.7   | 11       | 84.6   | <.0001                   | <.0001             |
| <i>MYCL2</i>   | 0       | 0    | 0        | 0    | 10       | 66.7   | 7        | 53.8   | <.0001                   | .0001              |
| <i>NEU1</i>    | 0       | 0    | 0        | 0    | 11       | 73.3   | 13       | 100    | <.0001                   | <.0001             |
| <i>PDGFRB</i>  | 0       | 0    | 1        | 4.8  | 5        | 33.3   | 13       | 100    | <.0001                   | <.0001             |
| <i>PENK</i>    | 0       | 0    | 1        | 4.8  | 9        | 60     | 11       | 84.6   | <.0001                   | <.0001             |
| <i>POMC</i>    | 0       | 0    | 1        | 4.8  | 11       | 73.3   | 9        | 69.2   | <.0001                   | .0001              |
| <i>RARA</i>    | 0       | 0    | 0        | 0    | 9        | 60     | 10       | 76.9   | <.0001                   | <.0001             |
| <i>RARB</i>    | 0       | 0    | 2        | 9.5  | 1        | 6.7    | 13       | 100    | <.0001                   | <.0001             |
| <i>SCGB3A1</i> | 0       | 0    | 1        | 4.8  | 7        | 46.7   | 13       | 100    | <.0001                   | <.0001             |
| <i>SEPT9</i>   | 0       | 0    | 0        | 0    | 12       | 80     | 10       | 76.9   | <.0001                   | <.0001             |
| <i>TAL1</i>    | 0       | 0    | 0        | 0    | 12       | 80     | 12       | 92,308 | <.0001                   | <.0001             |
| <i>TBX1</i>    | 0       | 0    | 0        | 0    | 11       | 73,333 | 11       | 84,615 | <.0001                   | <.0001             |
| <i>TERT</i>    | 0       | 0    | 0        | 0    | 11       | 73,333 | 12       | 92,308 | <.0001                   | <.0001             |
