# Supplementary material
Source: publisher figshare collection journal article supplement (https://karger.figshare.com/articles/dataset/_/3996102)
Supplement: Supplementary file 3 [file 1]

**Appendix C.** Comparison of the clinico-pathological features (%) of the patients included in each cluster

| <b>Variables</b>   | <b>Cluster 1<br/>n=9</b> | <b>Cluster 2<br/>n=21</b> | <b>Cluster 3<br/>n=15</b> | <b>Cluster 4<br/>n=13</b> | <b>p value</b> |
|--------------------|--------------------------|---------------------------|---------------------------|---------------------------|----------------|
| Gleason score      |                          |                           |                           |                           |                |
| 7                  | 77.8                     | 57.1                      | 60.0                      | 53.9                      |                |
| ≥ 8                | 22.2                     | 42.9                      | 40.0                      | 46.1                      | 0.38 *         |
| D'Amico risk group |                          |                           |                           |                           |                |
| Low                | 11.1                     | 0.0                       | 0.0                       | 0.0                       |                |
| Medium             | 55.6                     | 28.6                      | 20.0                      | 38.5                      |                |
| High               | 33.3                     | 71.4                      | 80.0                      | 61.5                      | 0.13 **        |
| T category         |                          |                           |                           |                           |                |
| T1                 | 33.3                     | 23.8                      | 20.0                      | 7.7                       |                |
| T2                 | 66.7                     | 33.3                      | 6.7                       | 38.5                      |                |
| T3                 | 0.0                      | 42.9                      | 73.3                      | 53.8                      | 0.02 **        |

\*Cochran Armitage test; \*\* Fisher test
